# Supplementary material for: A novel three-dimensional molecularly imprinted polypyrrole electrochemical sensor based on MOF derived porous carbon and nitrogen doped graphene for ultrasensitive determination of dopamine
Source: Royal Society of Chemistry journal article supplement (doi:10.1039/d2an01469f), 2022-01-01
Supplement: d2an01469f1.pdf [file d2an01469f1.pdf]

**Novel three-dimensional molecularly imprinting polypyrrole electrochemical sensor based on MOF derived porous carbon and nitrogen doped graphene for ultrasensitive determination of dopamine**

Liyin Bu<sup>a</sup>, Ding Jiang<sup>a</sup>, Qingyuan Song<sup>a</sup>, Xueling Shan<sup>a</sup>, Wenchang Wang<sup>a</sup>, Zhidong Chen<sup>a</sup>, \*

<sup>a</sup> Jiangsu Key Laboratory of Advanced Catalytic Materials and Technology, School of Petrochemical Engineering, Changzhou University, Changzhou 213164, China

<sup>b</sup> Advanced Catalysis and Green Manufacturing Collaborative Innovation Center Changzhou University, Changzhou, 213164, China

\*Corresponding author.

E-mail address: [zdchen@cczu.edu.cn](mailto:zdchen@cczu.edu.cn) (Z. Chen)

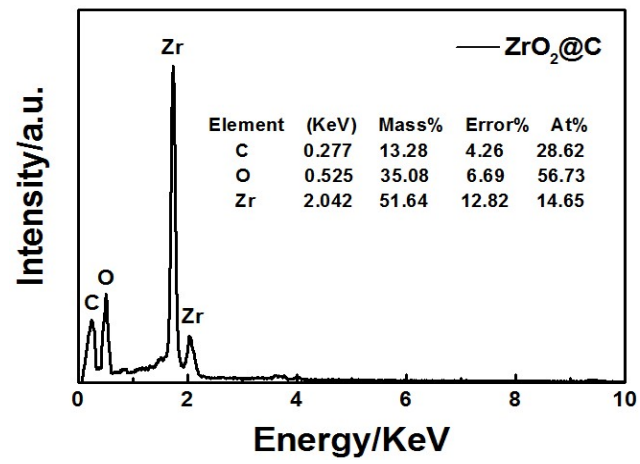

Fig. S1 The energy dispersive X-ray spectroscopy (EDX) of ZrO<sub>2</sub>@C

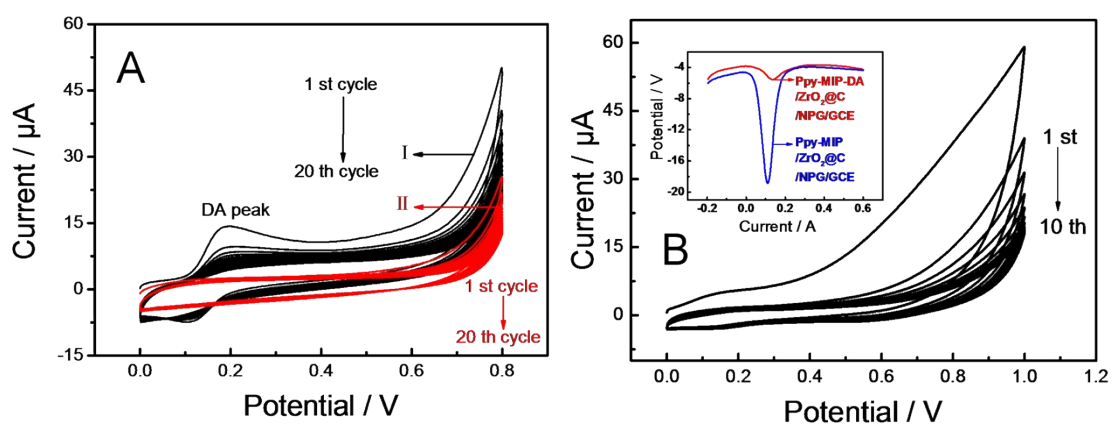

**Fig. S2** The scanning curve of Ppy-MIP-DA/ZrO<sub>2</sub>@C/NPG/GCE (I) and Ppy-NIP/ZrO<sub>2</sub>@C/NPG/GCE (II) in 0.05 M PBS containing 0.3 mM Py and 0.1 mM DA for 20 cycles (A); The scanning curve of Ppy-MIP-DA/ZrO<sub>2</sub>@C/NPG/GCE peroxidized in 0.1 M KOH for 10 cycles (B).

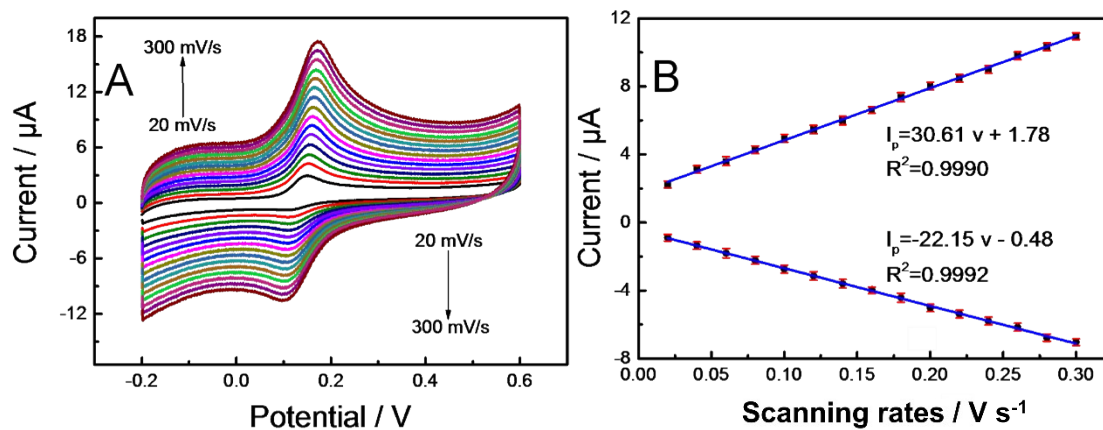

**Fig. S3** CV curve of Ppy-MIP/ZrO<sub>2</sub>@C/NPG/GCE at different scanning rates (20 mV/s, 40 mV/s, 60 mV/s, ..., 300 mV/s) in 0.05 M PBS containing 0.1 mM DA (A); The linear relationships between scanning rate and peak current of Ppy-MIP/ZrO<sub>2</sub>@C/NPG/GCE (B).

| Different modified electrodes                          | $R_{et}$ values |
|--------------------------------------------------------|-----------------|
| GCE                                                    | 123.6 $\Omega$  |
| UiO-66/GCE                                             | 1588.3 $\Omega$ |
| ZrO <sub>2</sub> @C/GCE                                | 68.0 $\Omega$   |
| NPG/GCE                                                | 48.0 $\Omega$   |
| ZrO <sub>2</sub> @C/NPG/GCE                            | 36.7 $\Omega$   |
| Ppy-MIP-DA/ZrO <sub>2</sub> @C/NPG/GCE                 | 8957.4 $\Omega$ |
| Ppy-MIP/ZrO <sub>2</sub> @C/NPG/GCE                    | 278.2 $\Omega$  |
| Ppy-NIP/ZrO <sub>2</sub> @C/NPG/GCE                    | 6612.3 $\Omega$ |
| Ppy-NIP/ZrO <sub>2</sub> @C/NPG/GCE after peroxidation | 5247.1 $\Omega$ |

**Table S1** The  $R_{et}$  values of different modified electrodes

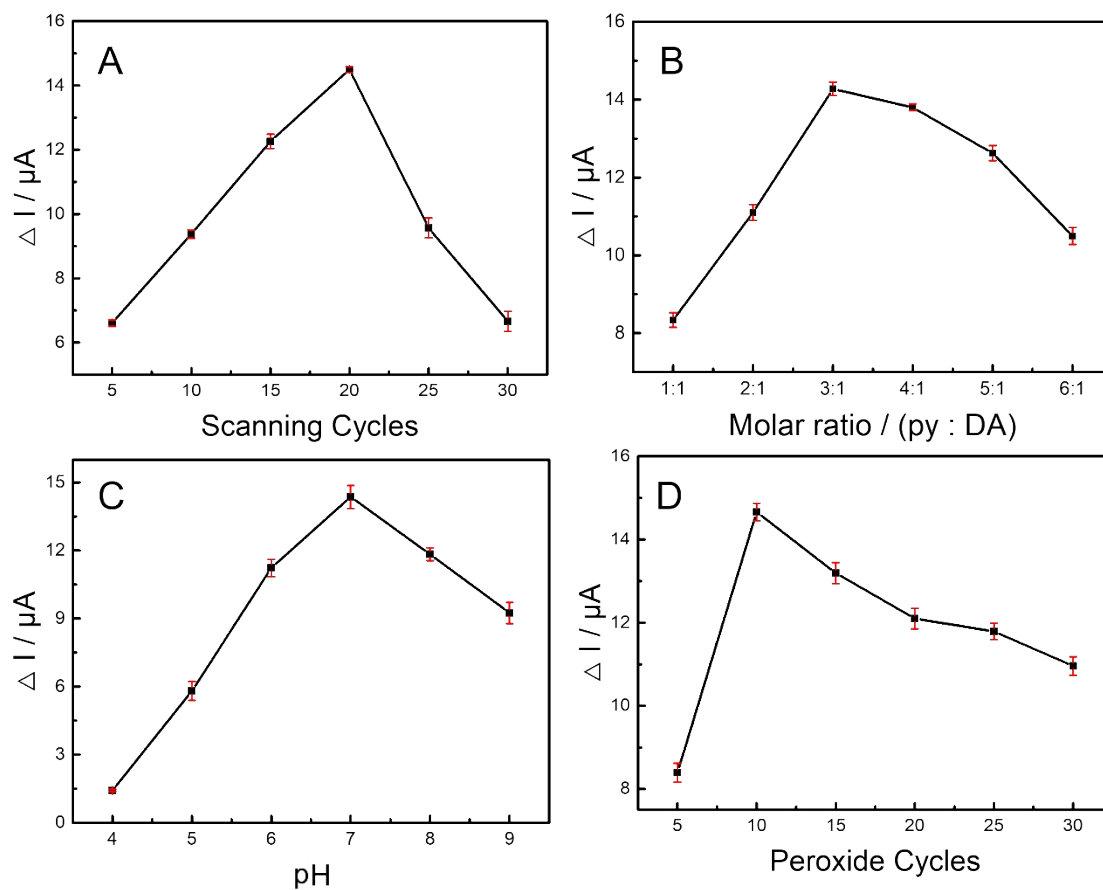

**Fig. S4** Effect of electropolymerization cycles in 0.05 M PBS containing 0.3 mM Py and 0.1 mM DA (A), the molar ratio of Py and DA (B), the pH of Electropolymerization solution (C), and peroxide cycles in 0.1 M KOH (D).

| Added (mol/L)        | Found (mol/L)           | Recovery (%) | RSD (%) (n=3) |
|----------------------|-------------------------|--------------|---------------|
| 0                    | None                    | 0            | 0             |
| 1.0×10 <sup>-5</sup> | 0.98 × 10 <sup>-5</sup> | 98.0         | 2.16          |
|                      | 1.02 × 10 <sup>-5</sup> | 102.0        |               |
|                      | 1.03 × 10 <sup>-5</sup> | 103.0        |               |
| 1.0×10 <sup>-6</sup> | 0.96 × 10 <sup>-6</sup> | 96.0         | 3.86          |
|                      | 1.05 × 10 <sup>-6</sup> | 105.0        |               |
|                      | 1.03 × 10 <sup>-6</sup> | 103.0        |               |

**Table S2** Determination of DA in real samples.
